# Supplementary material for: GS-5734 and its parent nucleoside analog inhibit Filo-, Pneumo-, and Paramyxoviruses
Source: PubMed Central journal article supplement (PMC5338263; doi:10.1038/srep43395), 2017-03-06
Supplement: srep43395-s1.pdf [file srep43395-s1.pdf]

## Supplementary Information for:

GS-5734 and its parent nucleoside analog inhibit Filo-, Pneumo-, and Paramyxoviruses

Michael K. Lo<sup>1\*</sup>, Robert Jordan<sup>2</sup>, Punya Shrivastava-Ranjan<sup>1</sup>, Anne L. Hotard<sup>1</sup>, Mike Flint<sup>1</sup>, Laura K. McMullan<sup>1</sup>, Dustin Siegel<sup>2</sup>, Michael Clarke<sup>2</sup>, Richard Mackman<sup>2</sup>, Hon Hui<sup>2</sup>, Michel Perron<sup>2</sup>, Tomas Cihlar<sup>2</sup>, Stuart T. Nichol<sup>1</sup>, Christina F. Spiropoulou<sup>1\*</sup>

<sup>1</sup>Centers for Disease Control and Prevention, Atlanta, Georgia, USA.

<sup>2</sup>Gilead Sciences, Inc. Foster City, California, USA.

\*Address for correspondence: Centers for Disease Control and Prevention 1600 Clifton Road, Mailstop G-14, Atlanta, GA 30333 USA

Email: [mko2@cdc.gov](mailto:mko2@cdc.gov), [ccs8@cdc.gov](mailto:ccs8@cdc.gov)

Disclaimer: The findings and conclusions in this report are those of the authors and do not necessarily represent those of the Centers for Disease Control and Prevention.

1 **Legends for Supplementary Figures and Tables:**

2 **Supplementary Figure 1.** Nuc inhibits recombinant fluorescent/luminescent reporter  
3 expressing Paramyxoviruses and Filoviruses, but not a reporter-expressing Bunyavirus  
4 (RVFV-GFP). Molecular structure of adenosine nucleoside analog GS-441524 (Nuc).  
5 Representative dose response curves depicting Nuc antiviral activity against the indicated  
6 recombinant reporter viruses. X-axis denotes concentration of Nuc, Y-axis denotes % reporter  
7 protein activity. Reporter activity levels derived from DMSO treated infected cells were set as  
8 100% reporter activity. Dose response curves were fitted to the mean value of experiments  
9 performed in quadruplicate for each concentration in the 10-point 3-fold dilution series using a  
10 4-parameter non-linear logistic regression curve with variable slope.

11 **Supplementary Figure 2.** Nuc inhibits viral antigen production of wild-type Paramxyo- and  
12 Filoviruses, but not for Bunya-(CCHFV) or Arenavirus (LASV). Cell-based fluorescence or  
13 chemiluminescence immunostaining antigen reduction assay. Representative dose response  
14 curves depicting Nuc antiviral activity against the indicated wild-type viruses. X-axis denotes  
15 concentration of Nuc, Y-axis denotes % specified viral antigen. Fluorescence/luminescence  
16 levels derived from DMSO treated infected cells were set as 100% viral antigen, while levels  
17 measured from uninfected cells were set to 0% antigen. Dose response curves were fitted to  
18 the mean value of experiments performed in either triplicate or quadruplicate for each  
19 concentration in the 7 or 10-point 3-fold dilution series respectively, using a 4-parameter non-  
20 linear logistic regression curve with variable slope.

21 **Supplementary Figure 3.** Nuc inhibits virus-induced cytopathic effect (CPE) by wild-type  
22 Paramxyoviruses, but not for a Rhabdo-(VSV) and minimally for tick-borne flaviviruses (AHFV,  
23 KFDV, OHFV, TBEV). Inhibition of virus-induced cytopathic effect was measured using  
24 CellTiter-Glo 2.0 assay reagent. Representative dose response curves depicting Nuc antiviral  
25 activity against the indicated wild-type viruses. X-axis denotes concentration of Nuc, Y-axis  
26 denotes % CPE inhibition. Luminescence levels (indicative of cellular ATP levels as a  
27 surrogate marker of cell viability) assayed from DMSO treated uninfected cells were set as  
28 100% CPE inhibition, while levels measured from DMSO treated infected cells were set to 0%  
29 CPE inhibition. Dose response curves were fitted to the mean value of experiments performed  
30 in either triplicate or quadruplicate for each concentration in the 7 or 10-point 3-fold dilution  
31 series respectively, using a 4-parameter non-linear logistic regression curve with variable  
32 slope.

33 **Supplementary Figure 4.** Nuc inhibits infectious virus production of wild-type NiV and EBOV.  
34 Infectious virus yield assay. Virus yield dose response graph depicting Nuc antiviral activity  
35 against the indicated wild-type viruses. X-axis denotes concentration of Nuc, Y-axis denotes  
36 infectious virus yield by TCID<sub>50</sub>. TCID<sub>50</sub> values for each data point represent the mean of  
37 quadruplicate infections for each concentration in the 10-point 3-fold dilution series of Nuc.  
38 Dotted line indicates limit of detection.

39 **Supplementary Figure 5.** Nuc does not cause significant cell cytotoxicity. Cell viability assay.  
40 Cell viability of Nuc treated uninfected cells was measured at 72 h post-treatment using

41 CellTiter-Glo 2.0 assay reagent. X-axis denotes concentration of Nuc, Y-axis denotes % Cell  
42 viability. Luminescence levels (indicative of cellular ATP levels as a surrogate marker of cell  
43 viability) assayed from DMSO treated uninfected cells were set as 100% cell viability.

44 **Supplementary Figure 6.** GS-5734 inhibits recombinant fluorescent/luminescent reporter  
45 Paramyxoviruses and Filoviruses, but not a reporter Bunyavirus (RVFV-GFP). Molecular  
46 structure of phosphoramidate-modified monophosphate adenine nucleotide analog GS-5734.  
47 Representative dose response curves depicting GS-5734 antiviral activity against the indicated  
48 recombinant reporter viruses. X-axis denotes concentration of GS-5734, Y-axis denotes %  
49 reporter protein activity. Reporter activity levels derived from DMSO treated infected cells were  
50 set as 100% reporter activity. Dose response curves were fitted to the mean value of  
51 experiments performed in quadruplicate for each concentration in the 10-point 3-fold dilution  
52 series using a 4-parameter non-linear logistic regression curve with variable slope.

53 **Supplementary Figure 7.** GS-5734 inhibits viral antigen production of a wild-type  
54 Paramyxovirus (MuV), but not Bunya-(CCHFV, ANDV) or Arenaviruses (LASV). Cell-based  
55 fluorescence or chemiluminescence immunostaining antigen reduction assay. Representative  
56 dose response curves depicting GS-5734 antiviral activity against the indicated wild-type  
57 viruses. X-axis denotes concentration of GS-5734, Y-axis denotes % specified viral antigen.  
58 Fluorescence/luminescence levels derived from DMSO treated infected cells were set as  
59 100%, while levels measured from uninfected cells were set to 0%. Dose response curves  
60 were fitted to the mean value of experiments performed in quadruplicate for each  
61 concentration in the 10-point 3-fold dilution series respectively, using a 4-parameter non-linear  
62 logistic regression curve with variable slope.

63 **Supplementary Figure 8.** GS-5734 inhibits virus-induced cytopathic effect (CPE) by wild-type  
64 Paramyxoviruses, but not for a Rhabdo-(VSV) and minimally for tick-borne flaviviruses (AHFV,  
65 KFDV, OHFV, TBEV). Inhibition of virus-induced cytopathic effect was measured using  
66 CellTiter-Glo 2.0 assay reagent. Representative dose response curves depicting GS-5734  
67 antiviral activity against the indicated wild-type viruses. X-axis denotes concentration of GS-  
68 5734, Y-axis denotes % CPE inhibition. Luminescence levels (indicative of cellular ATP levels  
69 as a surrogate marker of cell viability) assayed from DMSO treated uninfected cells were set  
70 as 100% CPE inhibition, while levels measured from DMSO treated virus infected cells were  
71 set to 0% CPE inhibition. Dose response curves were fitted to the mean value of experiments  
72 performed in quadruplicate for each concentration in the 10-point 2-fold or 3-fold dilution  
73 series, using a 4-parameter non-linear logistic regression curve with variable slope.

74 **Supplementary Figure 9.** GS-5734 inhibits NiV and EBOV minigenome transcription and  
75 replication. Minigenome assay. GS-5734. Representative dose response curves depicting GS-  
76 5734 antiviral activity against reporter NiV and EBOV minigenomes expressing  
77 NanoLuciferase and Gaussia Luciferase, respectively. X-axis denotes concentration of GS-  
78 5734, Y-axis denotes % reporter protein activity normalized to levels of cell viability. Reporter  
79 activity levels derived from DMSO treated minigenome transfected cells were set as 100%  
80 reporter activity. Dose response curves were fitted to the mean value of experiments

81 performed in quadruplicate for each concentration in the 10-point 3-fold dilution series using a  
82 4-parameter non-linear logistic regression curve with variable slope.

83 **Supplementary Figure 10.** GS-5734 inhibits infectious virus production of wild-type NiV and  
84 EBOV in primary human lung microvascular endothelial cells and primary human  
85 macrophages, respectively. Infectious virus yield assay. Virus yield dose response graph  
86 depicting GS-5734 antiviral activity against the indicated wild-type viruses. X-axis denotes  
87 concentration of GS-5734, Y-axis denotes infectious virus yield by TCID<sub>50</sub>. TCID<sub>50</sub> values for  
88 each data point represent the mean of quadruplicate infections for each concentration in the  
89 10-point 3-fold dilution series of GS-5734. Dotted line indicates limit of detection of the assay.  
90 Mφ- Macrophages; HMVEC-L- Human lung microvascular endothelial cells.

91 **Supplementary Figure 11.** GS-5734 induces cell cytotoxicity only at micromolar  
92 concentrations. Cell viability assay. Cell viability of GS-5734 treated uninfected cells was  
93 measured at 72 h post-treatment using CellTiter-Glo 2.0 assay reagent. X-axis denotes  
94 concentration of GS-5734, Y-axis denotes % Cell viability. Luminescence levels (indicative of  
95 cellular ATP levels as a surrogate marker of cell viability) assayed from DMSO treated  
96 uninfected cells were set as 100% cell viability. Mφ- Macrophages; HMVEC-L- Human lung  
97 microvascular endothelial cells.

98 **Supplementary Table 1: Nuc (GS-441524) antiviral activity against multiple virus**  
99 **families.** Mean 50% effective inhibition concentration (EC<sub>50</sub>) values derived from specific  
100 assays across indicated number of independent replicate experiments (in parentheses), with  
101 standard deviations displayed where applicable.

102 **Supplementary Table 2: GS-5734 antiviral activity against multiple virus families.** Mean  
103 50% effective inhibition concentration (EC<sub>50</sub>) values derived from specific assays across  
104 indicated number of independent replicate experiments (in parentheses), with standard  
105 deviations displayed where applicable.

106 **Supplementary Table 3: Cell cytotoxicity of Nuc and GS-5734 in various cell types.** Mean  
107 50% cytotoxic concentration (CC<sub>50</sub>) values derived from indicated un-infected cell types  
108 treated with either compound for 72 h before assayed for cellular adenosine triphosphate  
109 (ATP) levels as an indicator of cell viability using CellTiter-Glo 2.0 assay.

110

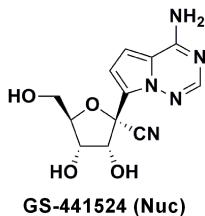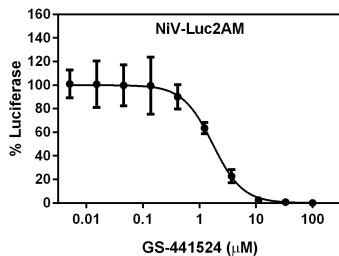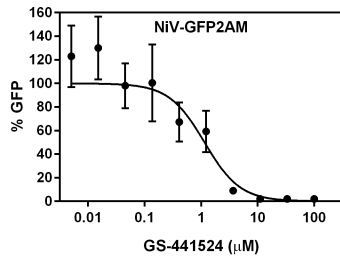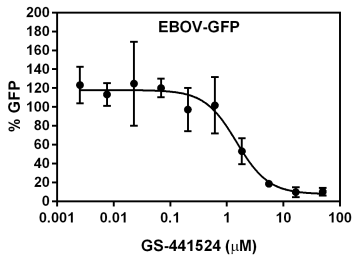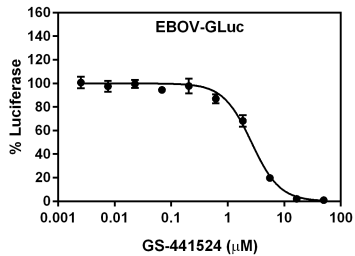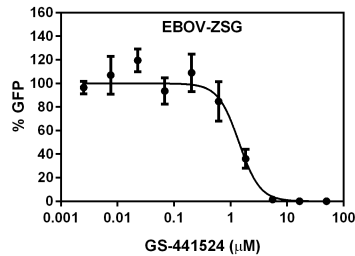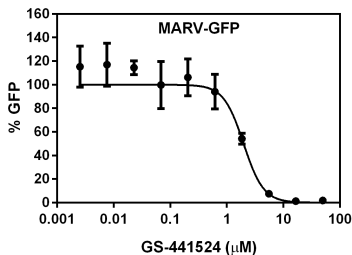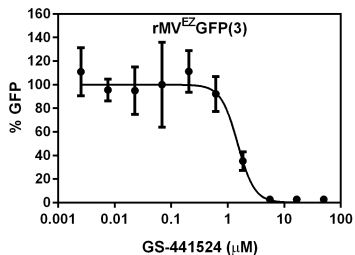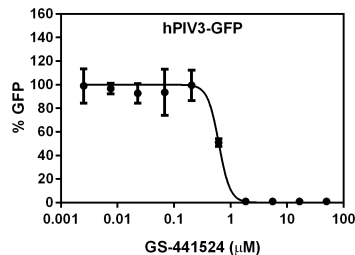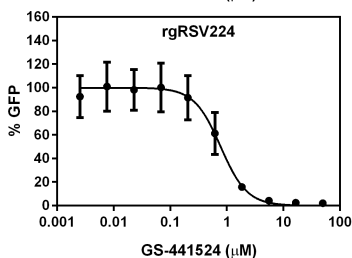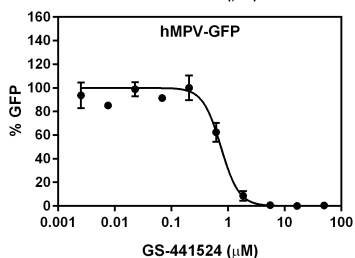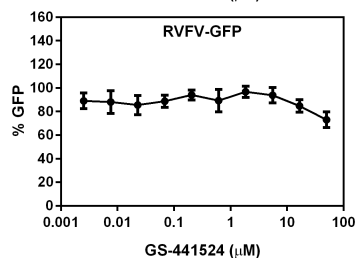

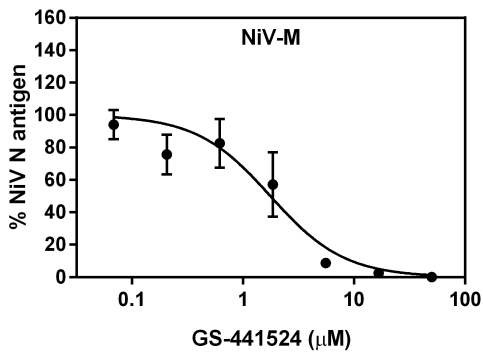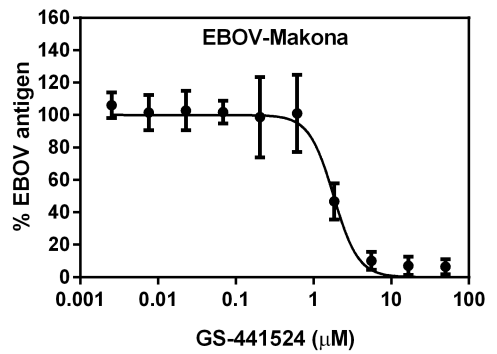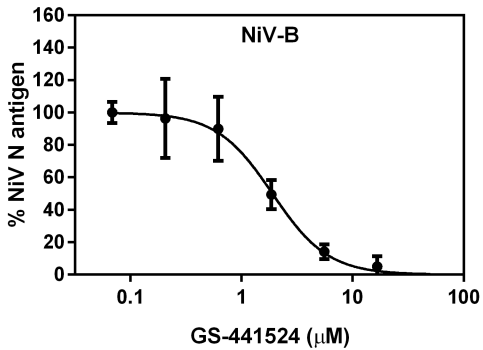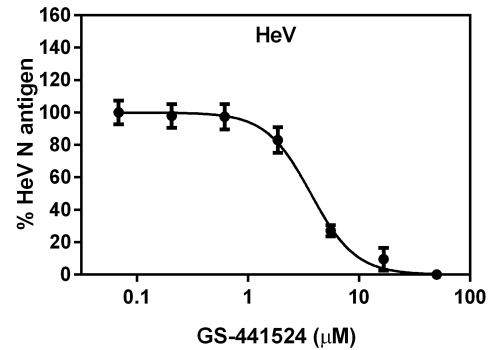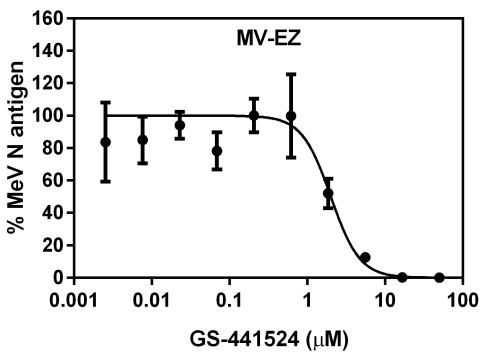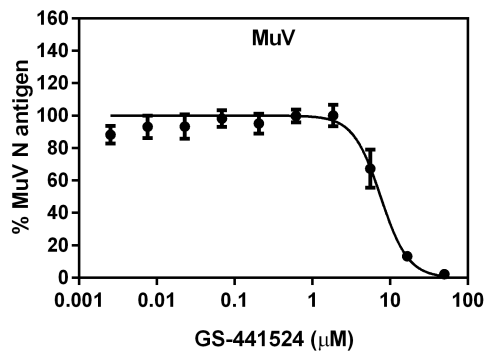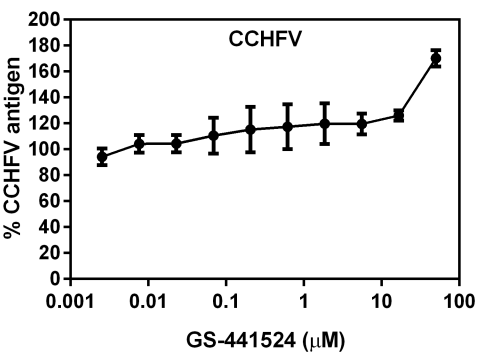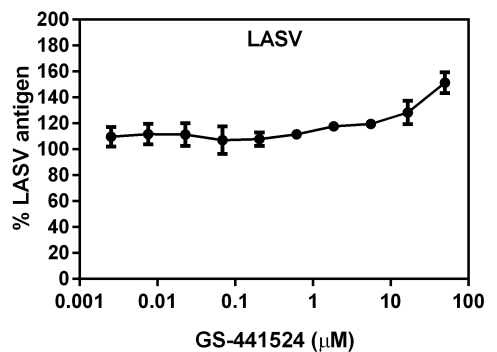

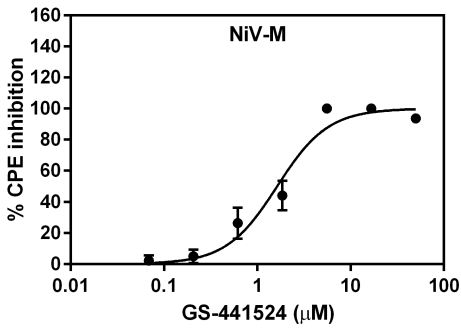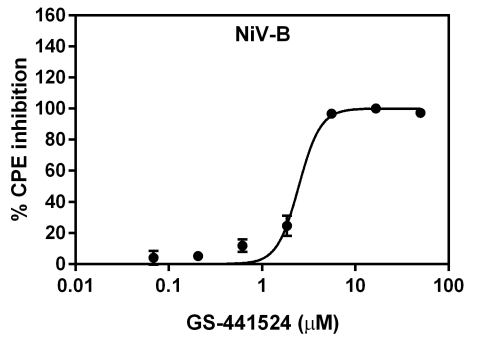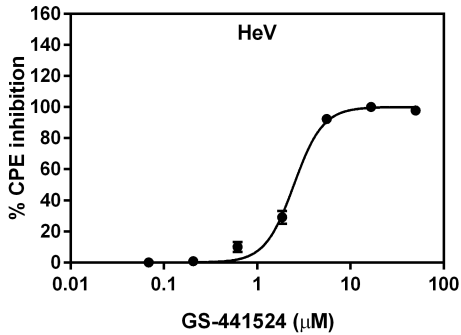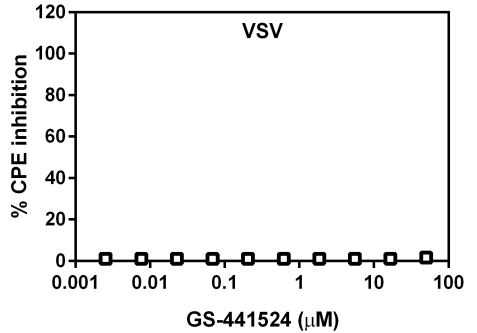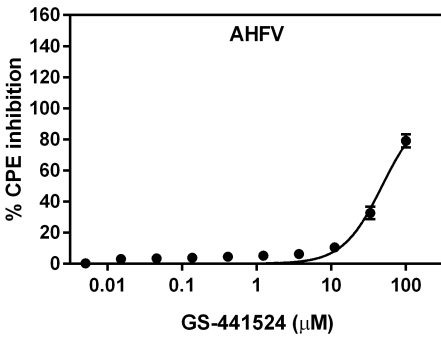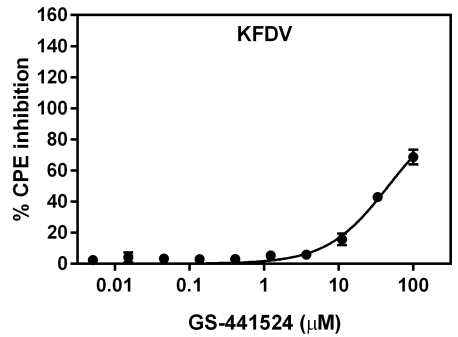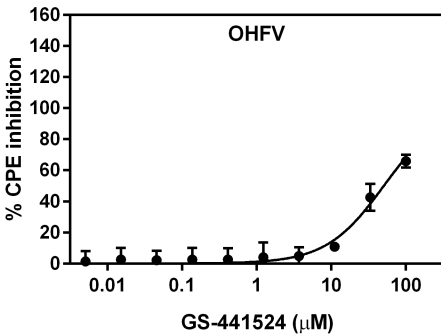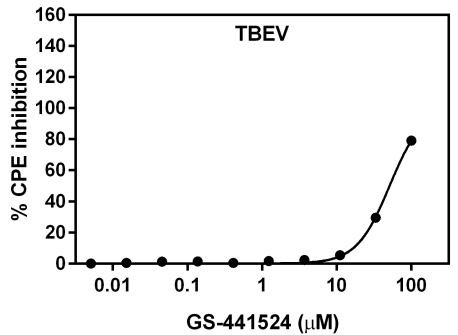

NiV-M (HeLa)

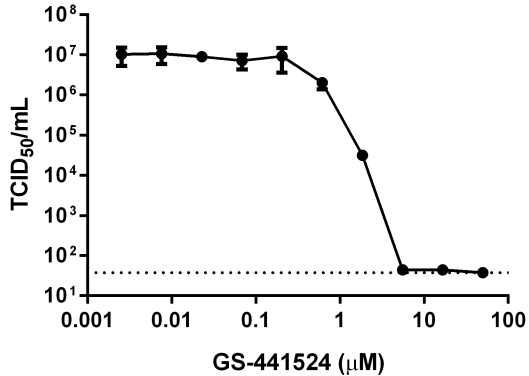

EBOV Makona (Huh7)

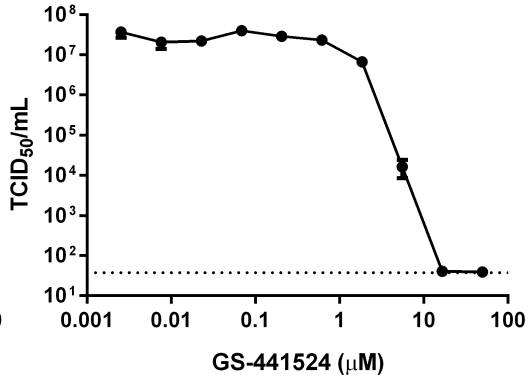



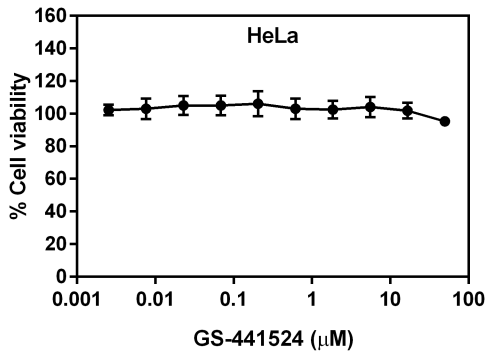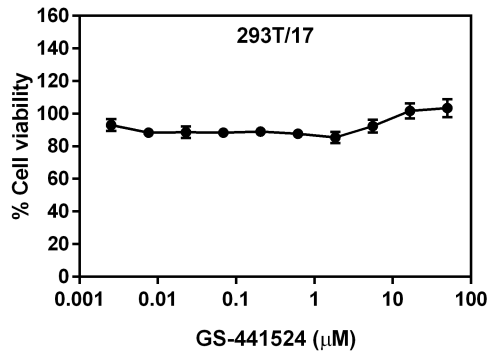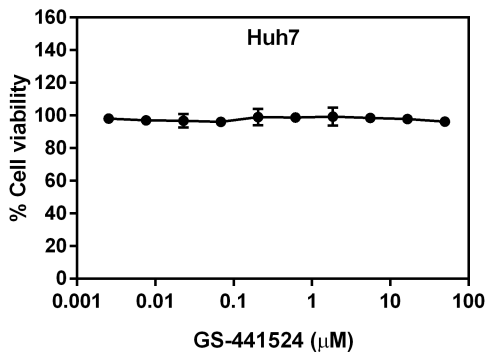

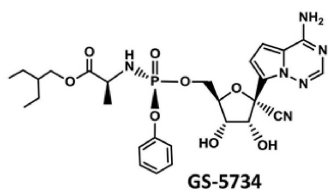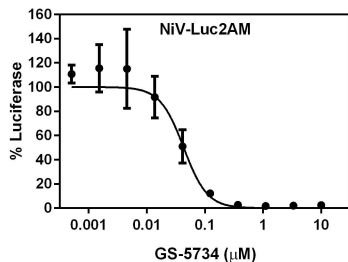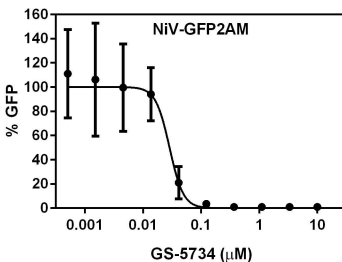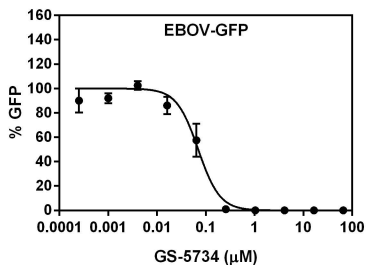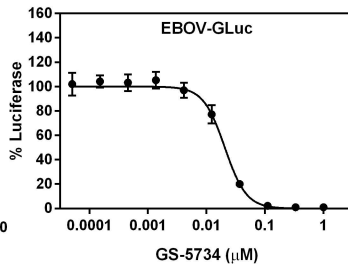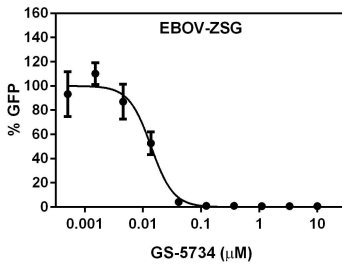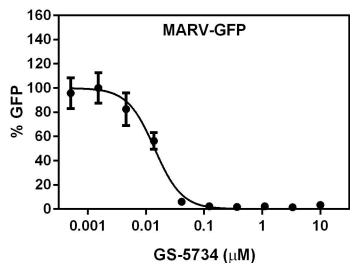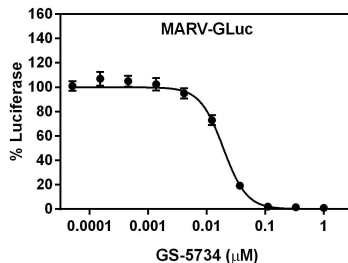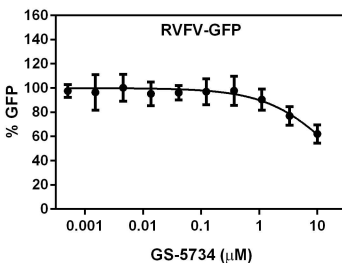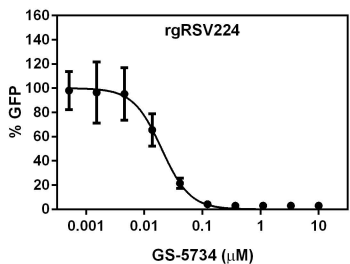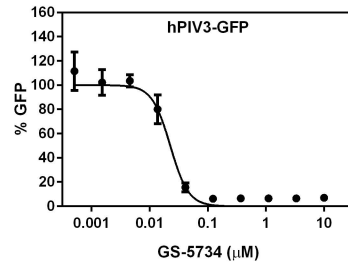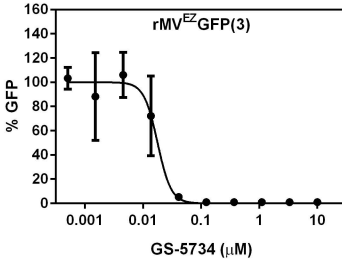

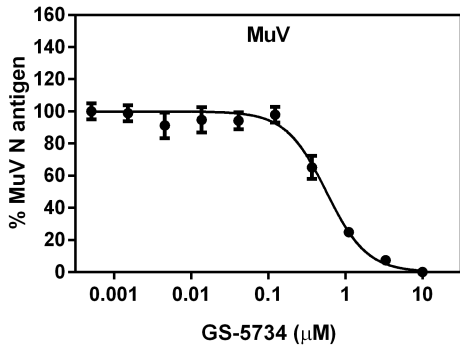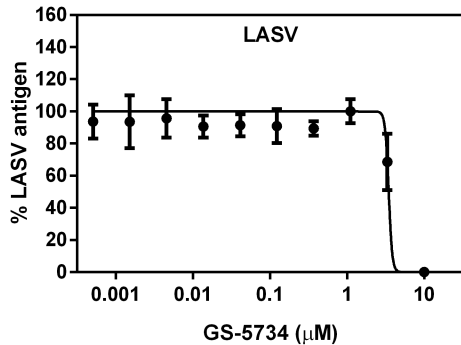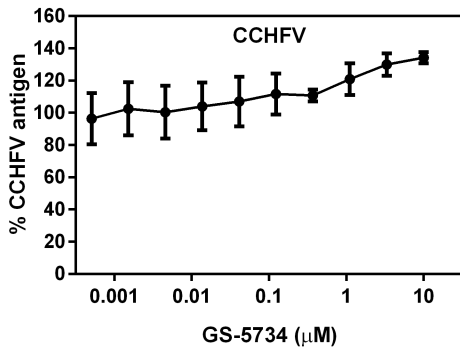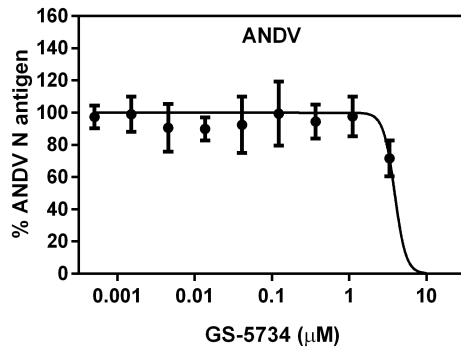

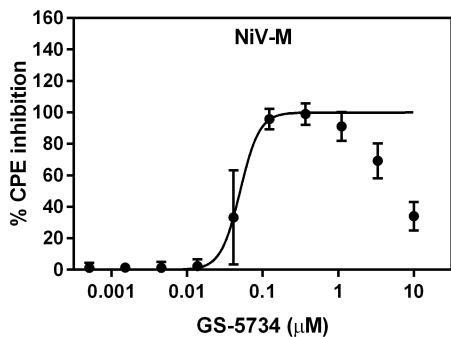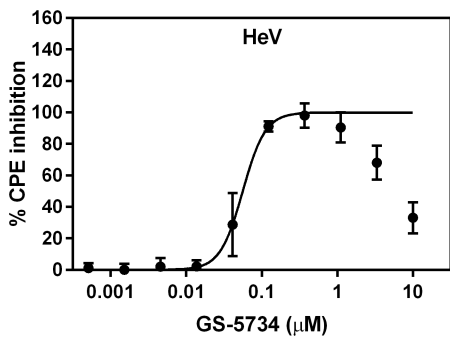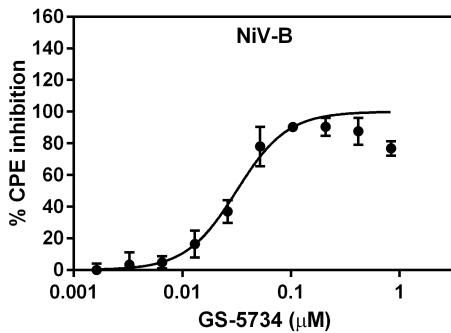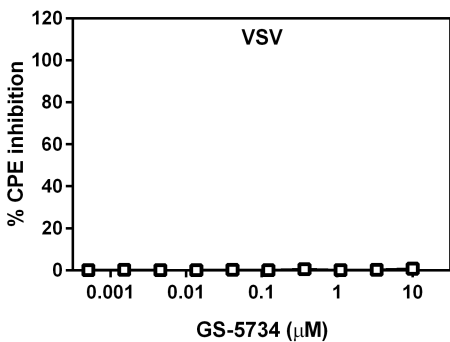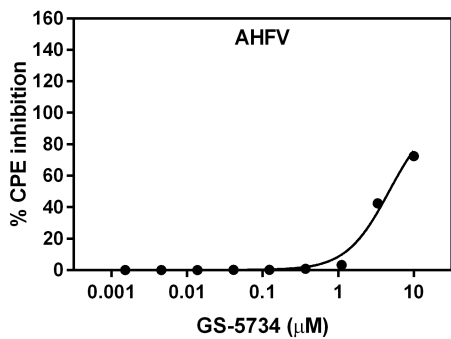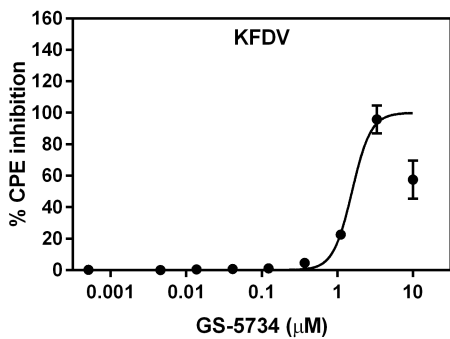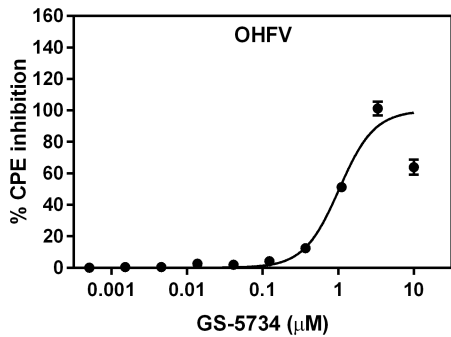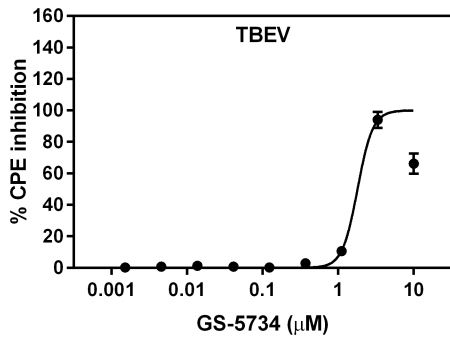

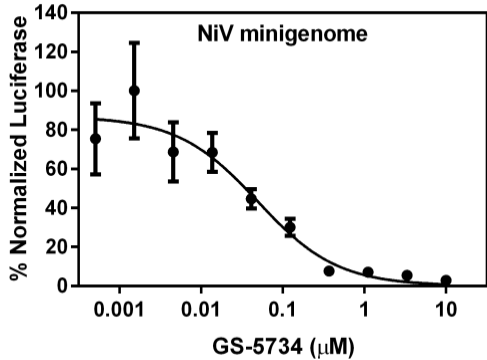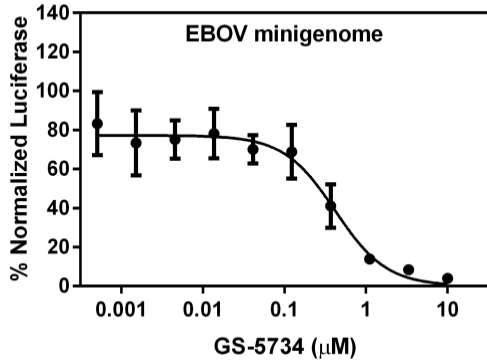

**NiV-M (HMVEC-L)**

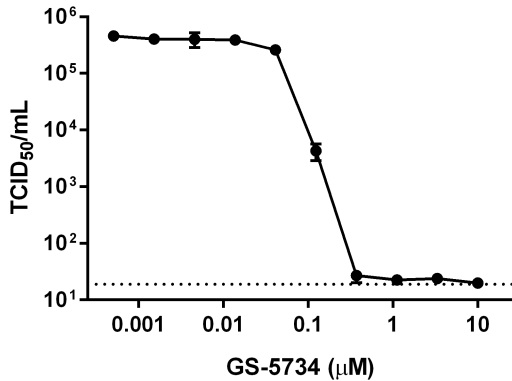

**EBOV Makona (Human Mφ)**

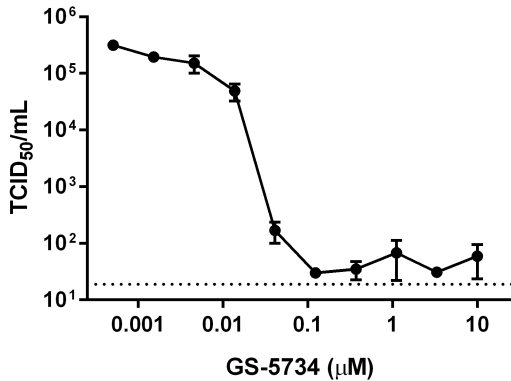

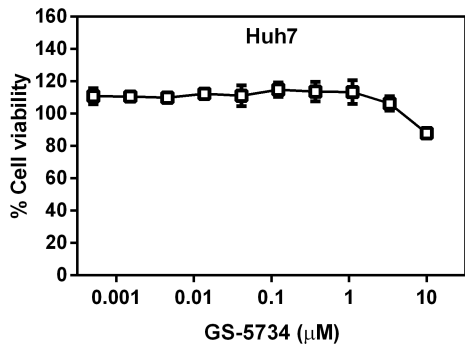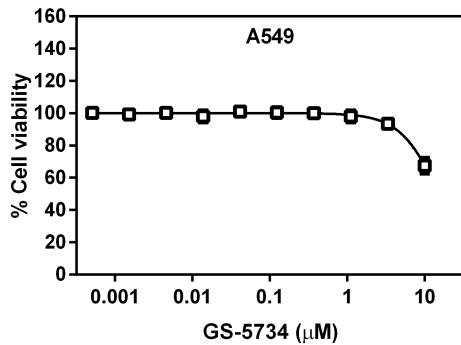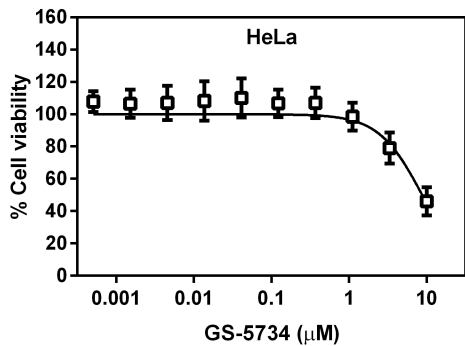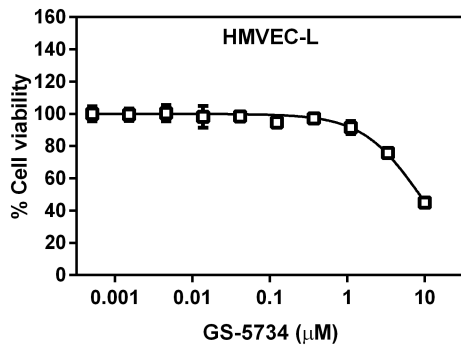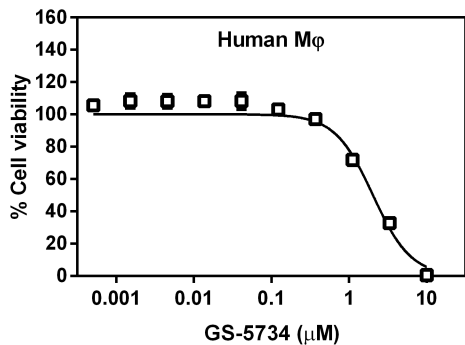

|              |         |                          | Nuc EC <sub>50</sub> (μM) |                         |                         |                             |
|--------------|---------|--------------------------|---------------------------|-------------------------|-------------------------|-----------------------------|
| Virus Family | Virus   | Strain                   | Reporter assay            | Antigen Reduction Assay | Cytopathic Effect Assay | Virus Titer reduction assay |
| Filo-        | EBOV    | Mayinga-GFP              | 1.61 ± 0.12 (n=2)         |                         |                         |                             |
|              |         | Mayinga-GLuc             | 3.1 (n=1)                 |                         |                         |                             |
|              |         | Makona-ZSG               | 1.28 ± 0.14 (n=2)         |                         |                         |                             |
|              |         | wt Makona                |                           | 1.61 ± 0.42 (n=5)       |                         | 1.02 (n=1)                  |
|              | MARV    | Bat371-GFP               | 1.86 ± 0.13 (n=2)         |                         |                         |                             |
| Paramyxo-    | NiV     | M-Luc2AM                 | 1.57 ± 0.78 (n=9)         |                         |                         |                             |
|              |         | M-GFP2AM                 | 2.23 ± 1.40 (n=2)         |                         |                         |                             |
|              |         | M-1999                   |                           | 1.84 ± 0.075 (n=2)      | 2.12 ± 0.56 (n=3)       | 0.67 ± 0.18 (n=2)           |
|              |         | B-2004                   |                           | 1.90 (n=1)              | 2.46 (n=1)              | 0.52 (n=1)                  |
|              | HeV     | 1996                     |                           | 3.68 (n=1)              | 2.48 ± 0.46 (n=3)       | 1.00 (n=1)                  |
|              | hPIV3   | JS-GFP                   | 0.52 ± 0.08 (n=2)         |                         |                         |                             |
|              | MV      | rMV <sup>EZ</sup> GFP(3) | 0.99 ± 0.36 (n=2)         |                         |                         |                             |
|              |         | EZ vaccine               |                           | 2.01 (n=1)              |                         |                             |
| MuV          | IA 2006 |                          | 9.7 ± 2.1 (n=3)           |                         |                         |                             |
| Pneumo-      | RSV     | rgRSV224 (A2)            | 0.63 ± 0.16 (n=2)         |                         |                         |                             |
|              | hMPV    | CAN97-83-GFP             | 0.73 ± 0.05 (n=4)         |                         |                         |                             |
| Bunya-       | RVFV    | ZH501-GFP                | > 50 (n=1)                |                         |                         |                             |
|              | CCHF    | IbAr 10200               |                           | > 50 (n=2)              |                         |                             |
|              | ANDV    | Chile 9717869            |                           |                         |                         |                             |
| Arena-       | LASV    | Josiah                   |                           | > 50 (n=2)              |                         |                             |
| Rhabdo-      | VSV     | New Jersey               |                           |                         | >50 (n=2)               |                             |
| Flavi-       | ALKV    | 200300001                |                           |                         | 49.92 ± 2.06 (n=2)      |                             |
|              | KFDV    | P9605                    |                           |                         | 46.34 (n=1)             |                             |
|              | TBEV    | Hypr                     |                           |                         | 51.24 (n=1)             |                             |
|              | OHFV    | Bogoluvovska             |                           |                         | 50.61 (n=1)             |                             |



|              |       |                          | GS-5734 EC <sub>50</sub> (μM) |                         |                         |                             |                  |
|--------------|-------|--------------------------|-------------------------------|-------------------------|-------------------------|-----------------------------|------------------|
| Virus Family | Virus | Strain                   | Reporter assay                | Antigen Reduction Assay | Cytopathic Effect Assay | Virus Titer reduction assay | Minigenome assay |
| Filo-        | EBOV  | Mayinga-GFP              | 0.066 ± 0.004 (n=2)           |                         |                         |                             | 0.42 (n=2)       |
|              |       | Mayinga-GLuc             | 0.0207 (n=1)                  |                         |                         |                             |                  |
|              |       | Makona-ZSG               | 0.0136 ± 0.001 (n=3)          |                         |                         |                             |                  |
|              |       | Makona                   |                               |                         |                         | 0.0034 (n=1)                |                  |
|              | MARV  | Bat 371-GFP              | 0.0139 ± 0.0003 (n=2)         |                         |                         |                             |                  |
|              |       | Bat 371-GLuc             | 0.0193 (n=1)                  |                         |                         |                             |                  |
| Paramyxo-    | NiV   | M-Luc2AM                 | 0.0449 ± 0.0018 (n=2)         |                         |                         |                             | 0.049 (n=2)      |
|              |       | M-GFP2AM                 | 0.0287 (n=1)                  |                         |                         |                             |                  |
|              |       | M-1999                   |                               |                         | 0.0655 ± 0.016 (n=2)    | 0.047 (n=1)                 |                  |
|              |       | B-2004                   |                               |                         | 0.0324 ± .0027 (n=4)    |                             |                  |
|              | HeV   | 1996                     |                               |                         | 0.0548 ± 0.0013 (n=2)   |                             |                  |
|              | MV    | rMV <sup>EZ</sup> GFP(3) | 0.0365 ± 0.028 (n=3)          |                         |                         |                             |                  |
|              |       | EZ vaccine               |                               |                         |                         |                             |                  |
|              |       | MuV                      | IA 2006                       |                         | 0.790 ± 0.117 (n=3)     |                             |                  |
|              | hPIV3 | JS-GFP                   | 0.0177 ± 0.0037 (n=3)         |                         |                         |                             |                  |
| Pneumo-      | RSV   | A2-GFP                   | 0.0211 ± 0.0011 (n=3)         |                         |                         |                             |                  |
| Bunya-       | RVFV  | ZH501-GFP                | > 10 (n=1)                    |                         |                         |                             |                  |
|              | CCHF  | IbAr 10200               |                               | > 10 (n=2)              |                         |                             |                  |
|              | ANDV  | Chile 9717869            |                               | 6.95 ± 3.1 (n=2)        |                         |                             |                  |
| Arena-       | LASV  | Josiah                   |                               | 4.49 ± 0.48 (n=2)       |                         |                             |                  |
| Rhabdo-      | VSV   | New Jersey               |                               |                         | > 10 (n=3)              |                             |                  |
| Flavi-       | ALKV  | 200300001                |                               |                         | 4.15 ± 0.48 (n=2)       |                             |                  |
|              | KFDV  | P9605                    |                               |                         | 1.78 ± 0.22 (n=2)       |                             |                  |
|              | TBEV  | Hypr                     |                               |                         | 2.06 ± 0.26 (n=2)       |                             |                  |
|              | OHFV  | Bogoluvovska             |                               |                         | 1.17 ± 0.14 (n=2)       |                             |                  |

|                | <b>Cell Cytotoxicity CC<sub>50</sub> (μM)</b> |                |
|----------------|-----------------------------------------------|----------------|
| <b>Cell ID</b> | <b>Nuc</b>                                    | <b>GS-5734</b> |
| HeLa           | >50                                           | 8.3            |
| Huh7           | >50                                           | >10            |
| A549           | NT                                            | >10            |
| 293T/17        | >50                                           | NT             |
| HMVEC-L        | NT                                            | 8.5            |
| Mφ             | NT                                            | 2              |

NT- not tested
